# Supplementary material for: Surface color and predictability determine contextual modulation of V1 firing and gamma oscillations
Source: eLife journal article supplement (doi:10.7554/elife.42101), 2019-02-04

Blue background

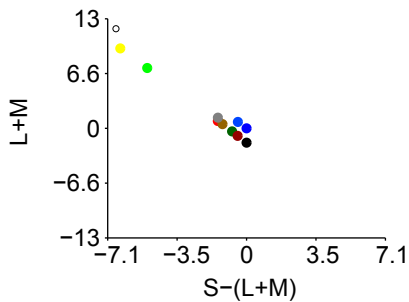

Green background

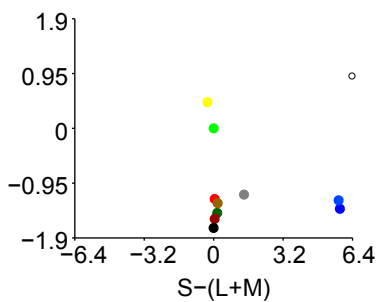

Red background

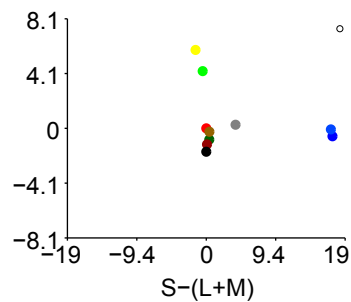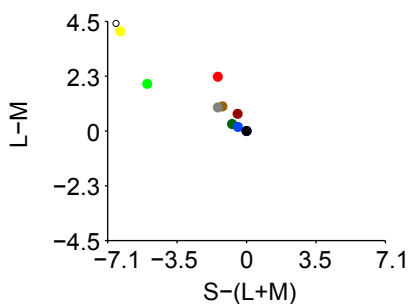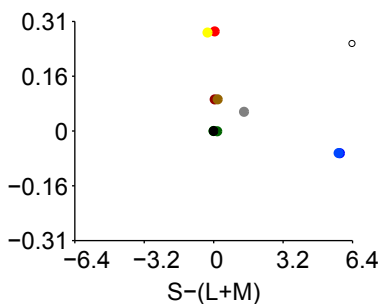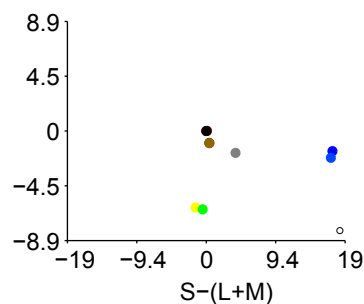

Yellow background

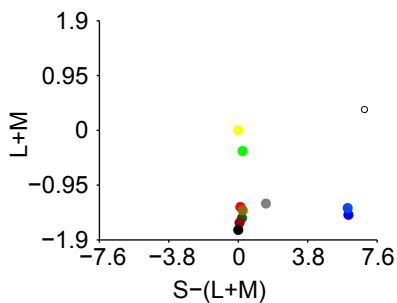

White background

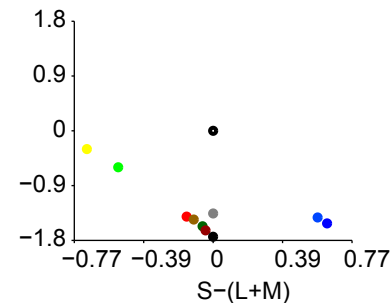

Gray background

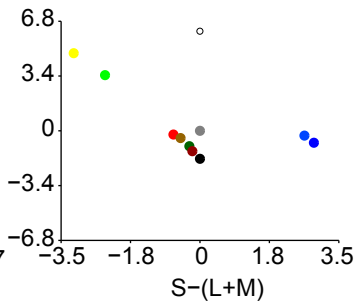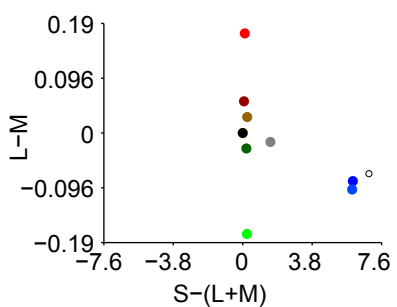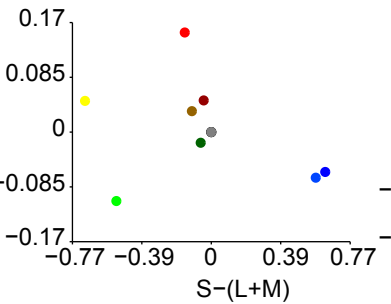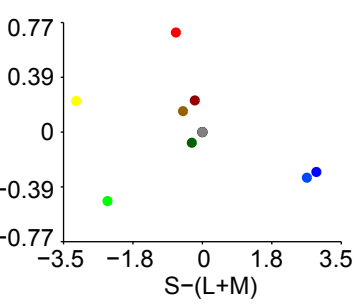

Supplement: supp [file elife_poa_e42101_Figure_6_figure_supplement_1.pdf › elife_poa_e42101_Figure_6_figure_supplement_1.pdf]
