# Supplementary figures and images for: Surface color and predictability determine contextual modulation of V1 firing and gamma oscillations
Source: eLife journal article supplement (doi:10.7554/elife.42101), 2019-02-04

**A**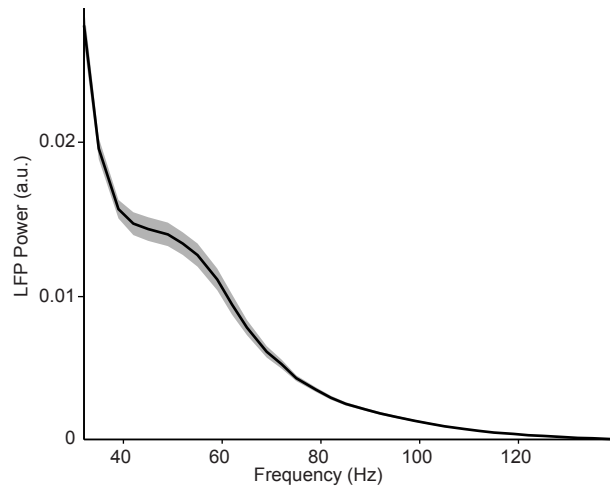**B**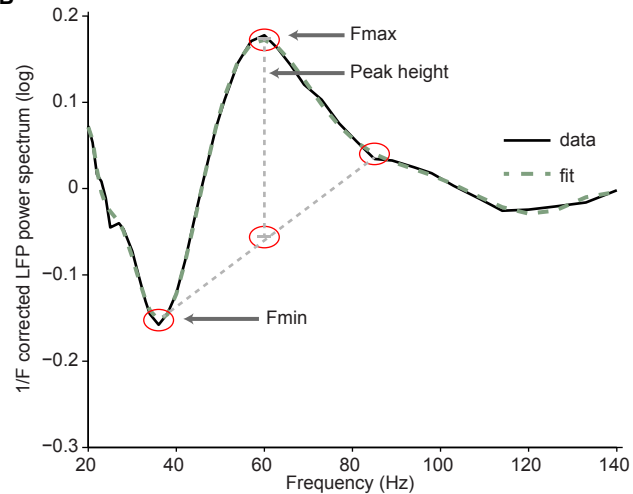

Supplement: supp [file elife_poa_e42101_Figure_1_figure_supplement_1.pdf › elife_poa_e42101_Figure_1_figure_supplement_1.pdf]

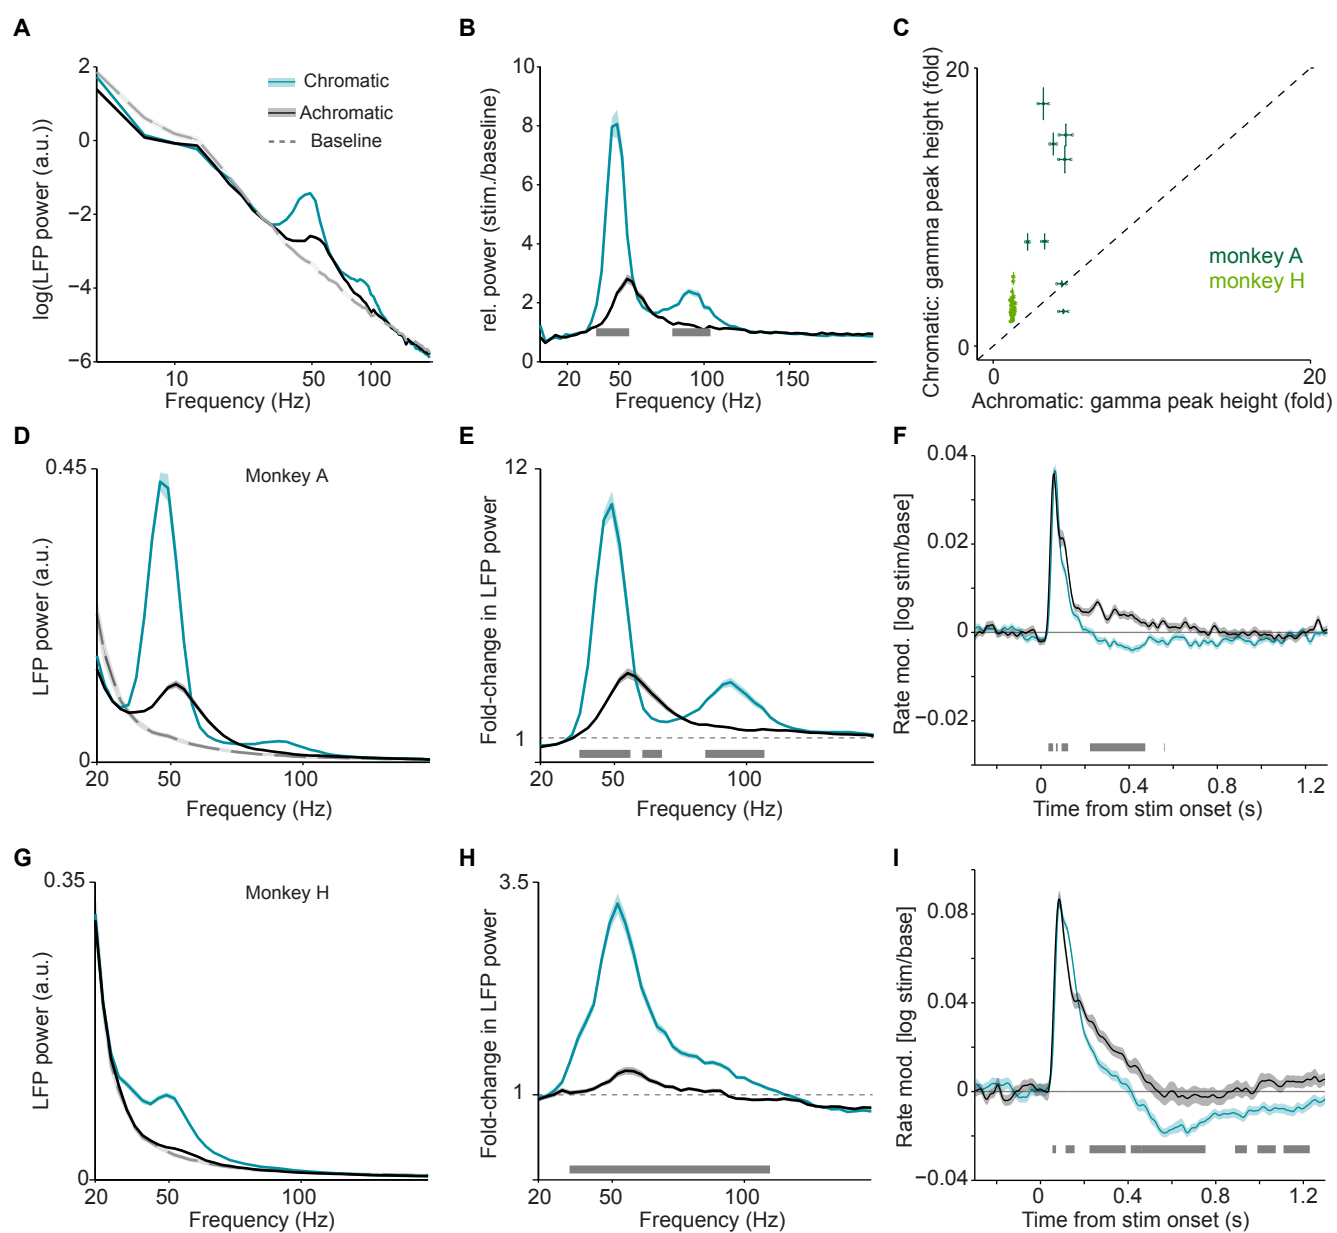

Supplement: supp [file elife_poa_e42101_Figure_1_figure_supplement_2.pdf › elife_poa_e42101_Figure_1_figure_supplement_2.pdf]

**A**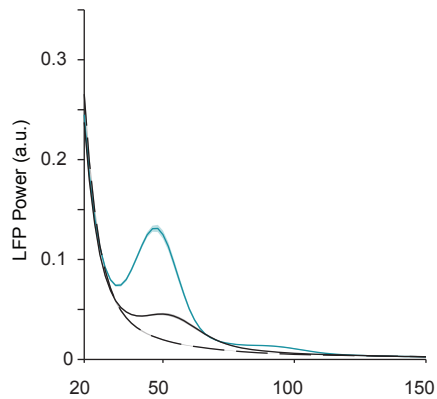

microsaccades included

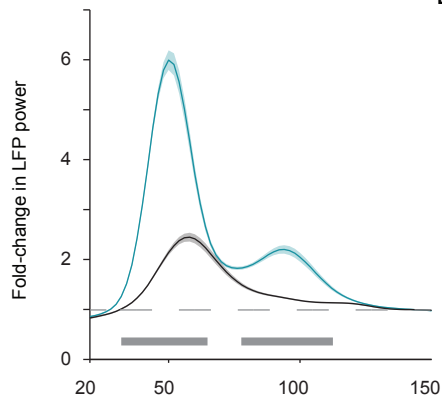**B**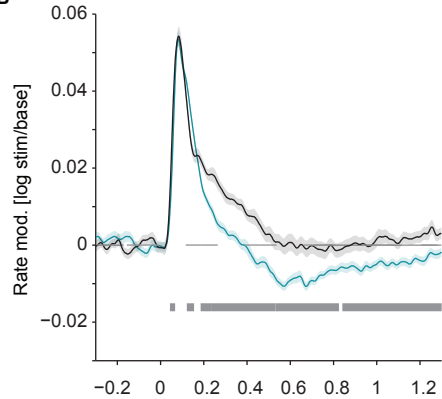

microsaccades excluded

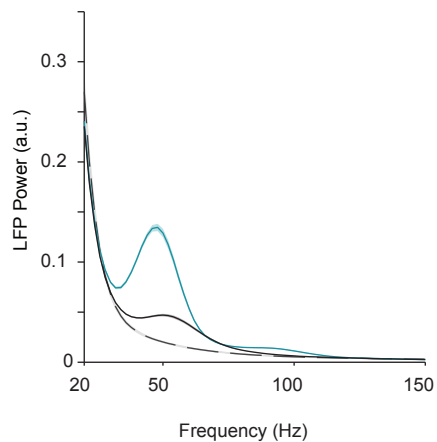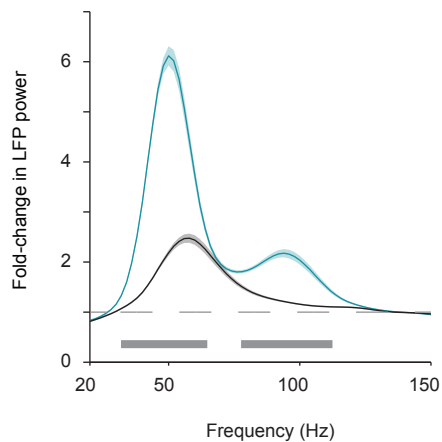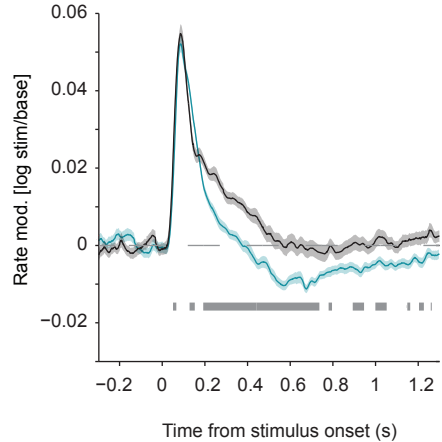

Supplement: supp [file elife_poa_e42101_Figure_1_figure_supplement_3.pdf › elife_poa_e42101_Figure_1_figure_supplement_3.pdf]

**A**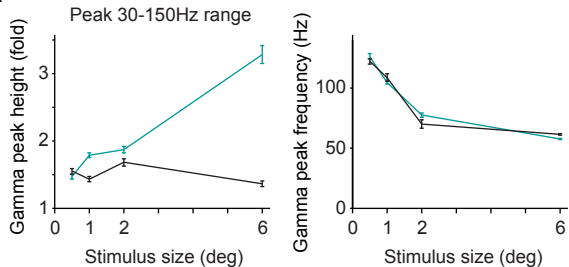**B**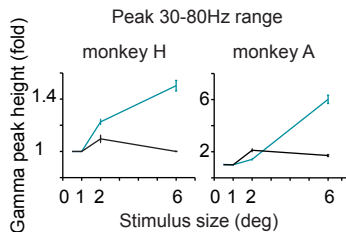**C**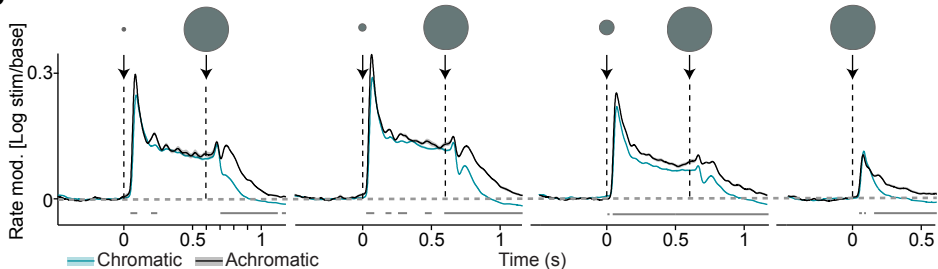

Supplement: supp [file elife_poa_e42101_Figure_2_figure_supplement_1.pdf › elife_poa_e42101_Figure_2_figure_supplement_1.pdf]

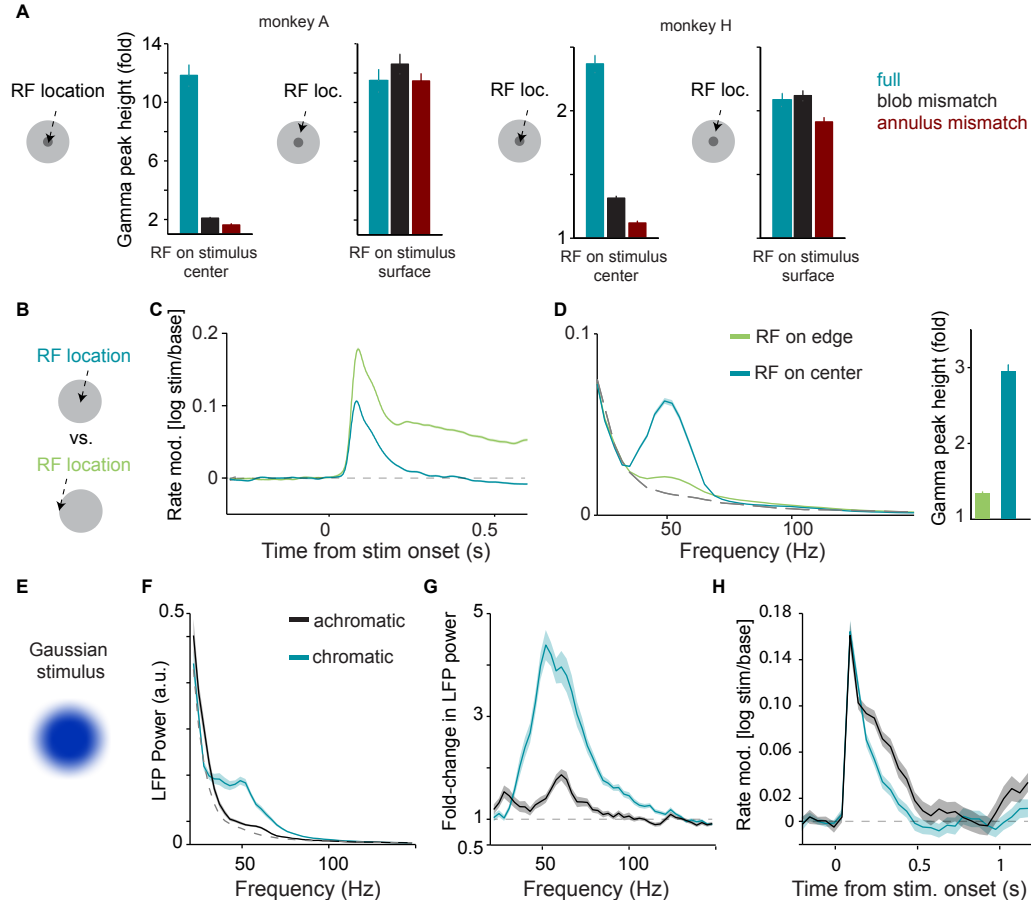

Supplement: supp [file elife_poa_e42101_Figure_3_figure_supplement_1.pdf › elife_poa_e42101_Figure_3_figure_supplement_1.pdf]

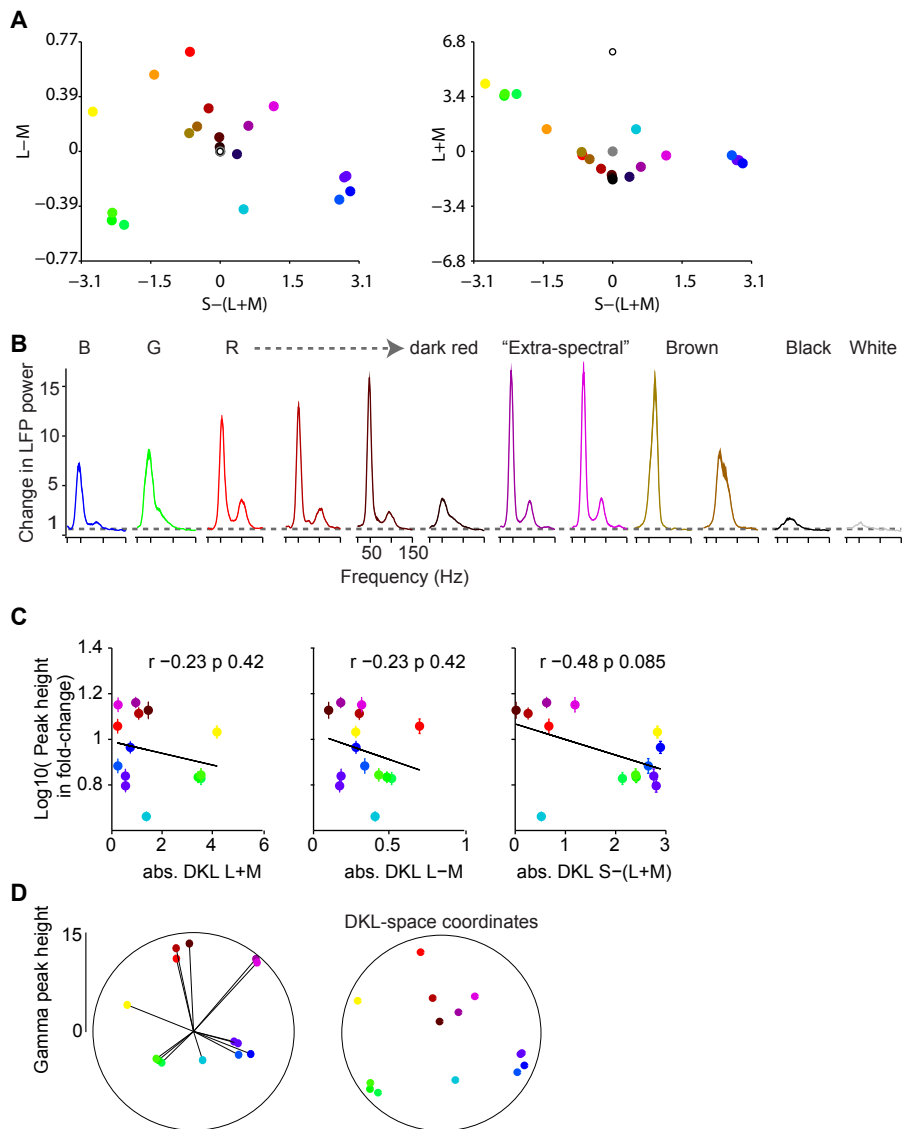

Supplement: supp [file elife_poa_e42101_Figure_4_figure_supplement_1.pdf › elife_poa_e42101_Figure_4_figure_supplement_1.pdf]

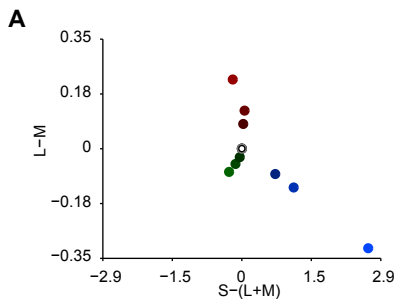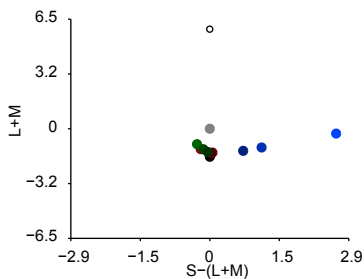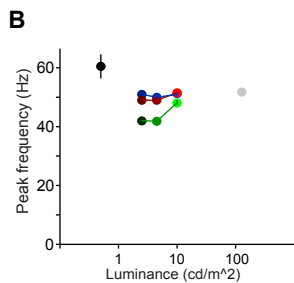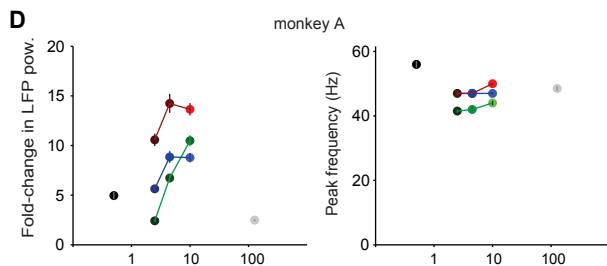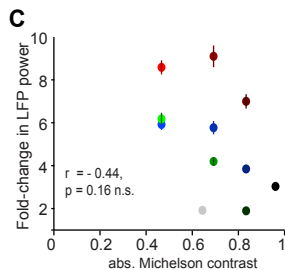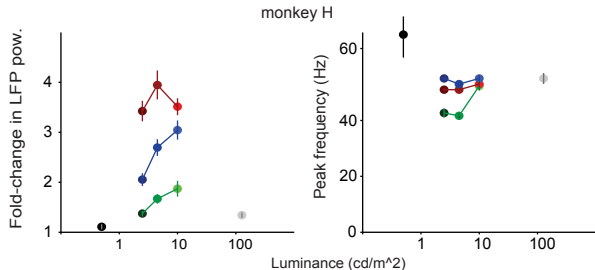

Supplement: supp [file elife_poa_e42101_Figure_4_figure_supplement_2.pdf › elife_poa_e42101_Figure_4_figure_supplement_2.pdf]

**A**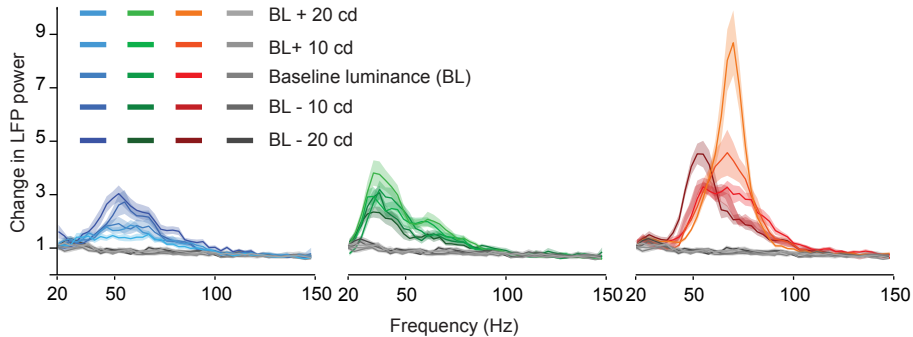**B**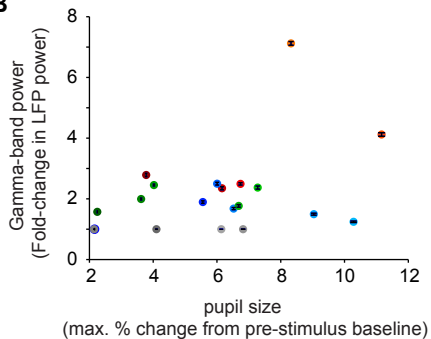

Supplement: supp [file elife_poa_e42101_Figure_4_figure_supplement_3.pdf › elife_poa_e42101_Figure_4_figure_supplement_3.pdf]

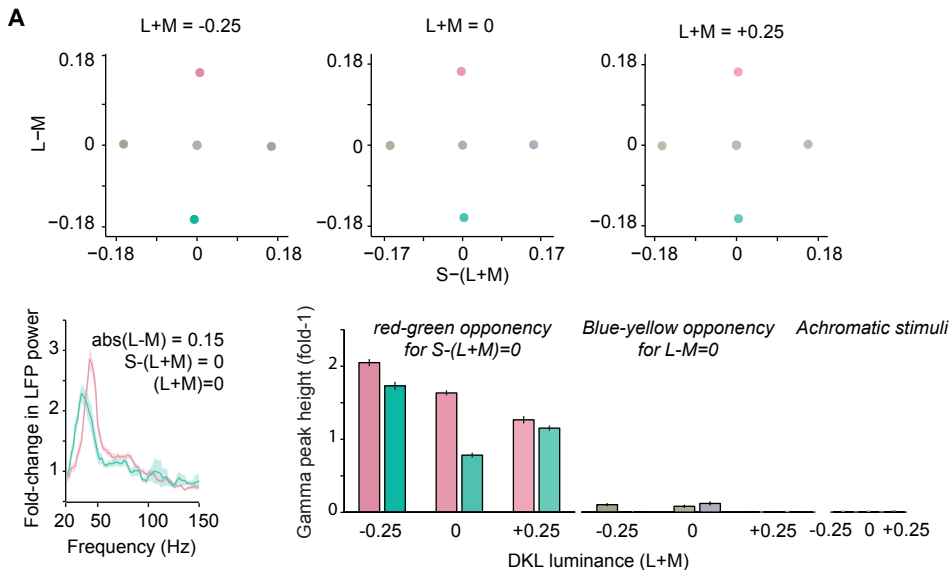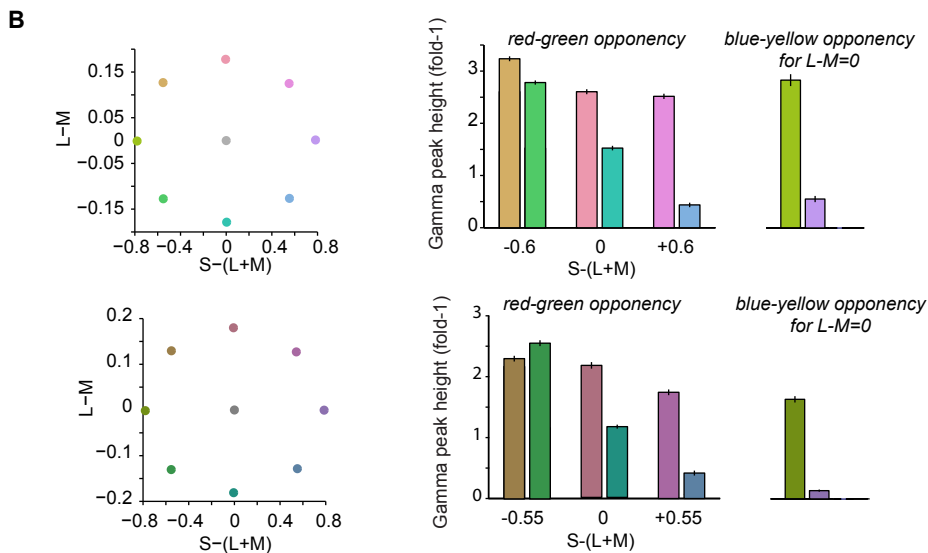

Supplement: supp [file elife_poa_e42101_Figure_4_figure_supplement_4.pdf › elife_poa_e42101_Figure_4_figure_supplement_4.pdf]

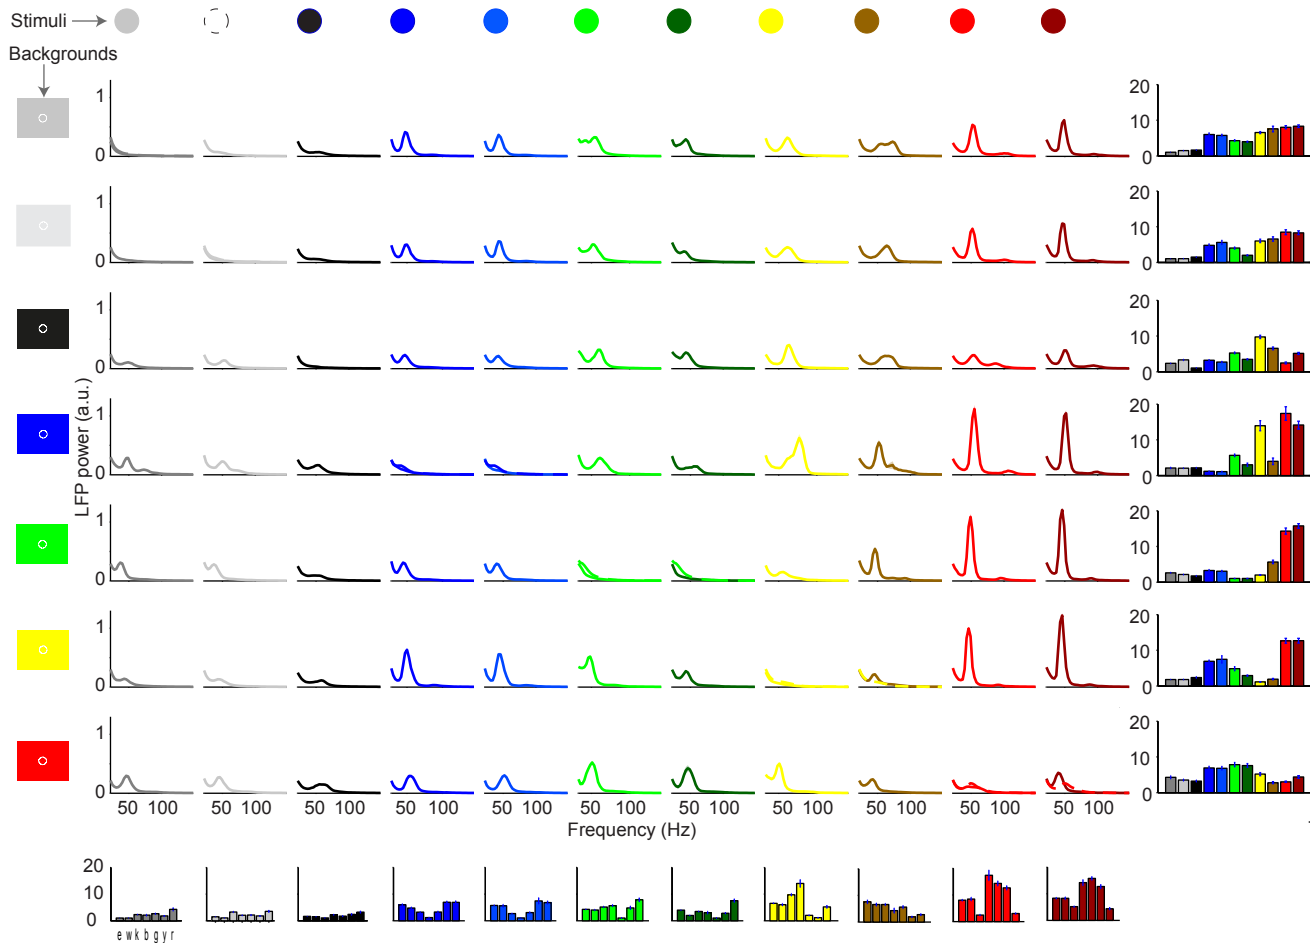

Supplement: supp [file elife_poa_e42101_Figure_6_figure_supplement_2.pdf › elife_poa_e42101_Figure_6_figure_supplement_2.pdf]

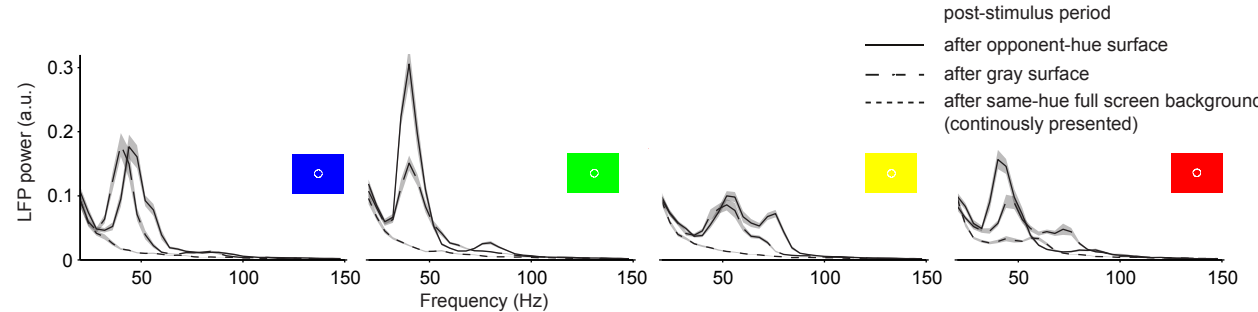

Supplement: supp [file elife_poa_e42101_Figure_6_figure_supplement_3.pdf › elife_poa_e42101_Figure_6_figure_supplement_3.pdf]

## Red-Green Opponency

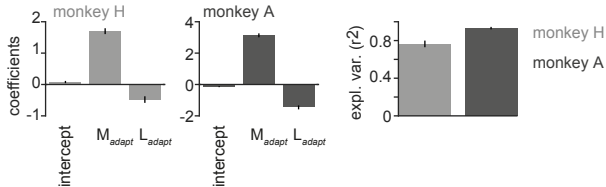

## Blue-Yellow Opponency

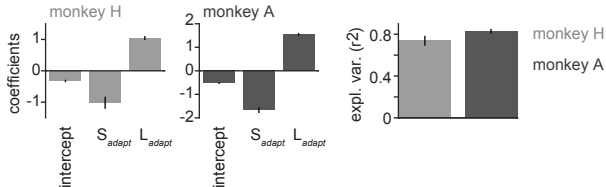

Supplement: supp [file elife_poa_e42101_Figure_7_figure_supplement_1.pdf › elife_poa_e42101_Figure_7_figure_supplement_1.pdf]
